# Supplementary material
Source: PubMed Central journal article supplement (PMC8935715)
Supplement: 12879_2022_7239_MOESM1_ESM.pdf [file 12879_2022_7239_MOESM1_ESM.pdf]

Additional File 1: Effectiveness of the BNT162b2  
(Pfizer-BioNTech) and the ChAdOx1 nCoV-19  
(Oxford-AstraZeneca) vaccines for reducing susceptibility to  
infection with the Delta variant (B.1.617.2) of SARS-CoV-2

Karan Pattni<sup>1</sup>, Daniel Hungerford<sup>2</sup>, Sarah Adams<sup>3</sup>, Iain Buchan<sup>4</sup>,  
Christopher P Cheyne<sup>5</sup>, Marta García-Fiñana<sup>5</sup>, Ian Hall<sup>6,7</sup>, David M Hughes<sup>5</sup>,  
Christopher E Overton<sup>6</sup>, Xingna Zhang<sup>4</sup>, Kieran J. Sharkey<sup>1,\*</sup>

<sup>1</sup>Department of Mathematical Sciences, University of Liverpool, Liverpool, UK

<sup>2</sup>Centre for Global Vaccine Research, Institute of Infection, Veterinary and  
Ecological Sciences, University of Liverpool, Liverpool, UK

<sup>3</sup>Graphnet Health, Milton Keynes, UK

<sup>4</sup>Institute of Population Health, University of Liverpool, Liverpool, UK

<sup>5</sup>Department of Health Data Science, University of Liverpool, Liverpool, UK

<sup>6</sup>Department of Mathematics and School of Health Sciences, University of  
Manchester, Manchester, UK

<sup>7</sup>Joint Universities Pandemic and Epidemiological Research, Manchester, UK

\*Corresponding Author: Kieran J. Sharkey, Department of Mathematical Sciences,  
University of Liverpool; +44 (0)151 794 4023 — kjs@liverpool.ac.uk

## S1 Demographics for Population of Interest

Table S1.1: Demographics for population of interest.

| Characteristic         | Variable                                    | Summary           |
|------------------------|---------------------------------------------|-------------------|
| Number of participants |                                             | 2,730,111         |
| Age (in years)         | Recorded                                    | 2,730,111         |
|                        | Unrecorded                                  | 0                 |
|                        | Mean (standard deviation)                   | 42.1 (23.7)       |
|                        | Median (Q1, Q3)                             | 42.0 (23.0, 61.0) |
|                        | Range                                       | 0.0-109.0         |
| Sex                    | Recorded                                    | 2,730,029         |
|                        | Unrecorded                                  | 82                |
|                        | Male                                        | 1,360,509 (49.8%) |
|                        | Female                                      | 1,369,520 (50.2%) |
| Ethnicity              | Recorded                                    | 2,186,803         |
|                        | Unrecorded                                  | 543,308           |
|                        | Black, African, Black British, or Caribbean | 19,674 (0.9%)     |
|                        | Asian or Asian British                      | 37,353 (1.7%)     |
|                        | Another ethnic group                        | 83,079 (3.8%)     |
|                        | Mixed or multiple ethnic group              | 47,322 (2.2%)     |
|                        | White                                       | 1,999,375 (91.4%) |

Table S1.2: Vaccine doses administered by age group as extracted on 3rd Sep 2021, including those who died prior to having the vaccine or those who moved into or out of the area over the time period.

No missing values due to the definition that no recorded values means no doses administered.

| Age Group (years) | Total     | No Doses        | One Dose        | Both Doses        |
|-------------------|-----------|-----------------|-----------------|-------------------|
| <18               | 518,696   | 495,612 (95.5%) | 20,040 (3.9%)   | 3,044 (0.6%)      |
| 18-39             | 772,847   | 274,896 (35.6%) | 115,213 (14.9%) | 382,738 (49.5%)   |
| 40-59             | 678,147   | 111,745 (16.4%) | 30,041 (4.4%)   | 536,361 (79.1%)   |
| 60-79             | 545,019   | 43,884 (8.1%)   | 8,515 (1.6%)    | 492,620 (90.4%)   |
| $\geq 80$         | 158,964   | 22,810 (14.3%)  | 3,720 (2.3%)    | 132,434 (83.3%)   |
| All               | 2,730,111 | 954,189 (35.0%) | 178,699 (6.5%)  | 1,597,223 (58.5%) |

## S2 MCMC Parameter Estimates, Trace Plots and Posterior Distributions

Table S2.1: Parameter median estimates and 95% credible interval for all model fits. Notation is as follows  $\beta$ : Transmission rate,  $e_{ij}$ : Effectiveness of  $i$  doses of vaccine  $j$ , Initial  $I$ : Initial number of unvaccinated infected individuals, Initial  $I_{ij}$ : Initial number of infected individuals who have received  $i$  doses of vaccine  $j$ ,  $\mu_i$ : Infectiveness of an infected individual with  $i$  doses of either vaccine. For number of doses we have  $i \in \{1, 2\}$  and for vaccines  $j \in \{A, P\}$  for Oxford-AstraZeneca and Pfizer-BioNTech respectively.

| Parameter        | Core Model<br>( $\gamma = 1/7$ ) | Sensitivity to $\gamma$<br>( $\gamma = 1/3$ ) | Sensitivity to $\gamma$<br>( $\gamma = 1/11$ ) | Double Recovered<br>( $\gamma = 1/7$ ) |
|------------------|----------------------------------|-----------------------------------------------|------------------------------------------------|----------------------------------------|
| $\beta$          | 0.406<br>[0.3893, 0.4425]        | 0.7581<br>[0.7239, 0.8146]                    | 0.3104<br>[0.2953, 0.3448]                     | 0.4303<br>[0.4121, 0.4702]             |
| $e_{1A}$         | 0.3851<br>[0.3425, 0.426]        | 0.3528<br>[0.3117, 0.3918]                    | 0.408<br>[0.3624, 0.4515]                      | 0.3637<br>[0.3194, 0.4058]             |
| $e_{2A}$         | 0.6402<br>[0.614, 0.6647]        | 0.6618<br>[0.6378, 0.6843]                    | 0.6247<br>[0.5964, 0.6513]                     | 0.633<br>[0.6066, 0.6582]              |
| $e_{1P}$         | 0.1954<br>[0.1041, 0.2809]       | 0.263<br>[0.1815, 0.3399]                     | 0.1436<br>[0.0452, 0.2353]                     | 0.1834<br>[0.0914, 0.2692]             |
| $e_{2P}$         | 0.8392<br>[0.8212, 0.8559]       | 0.8425<br>[0.8254, 0.8583]                    | 0.8369<br>[0.8181, 0.8549]                     | 0.8365<br>[0.8183, 0.8534]             |
| Initial $I$      | 54.0151<br>[48.4328, 59.5435]    | 46.6017<br>[40.3953, 52.3173]                 | 56.2925<br>[50.9526, 61.6423]                  | 54.0704<br>[48.4778, 59.5674]          |
| Initial $I_{1A}$ | 14.8932<br>[10.3012, 19.8382]    | 12.8806<br>[8.042, 18.6471]                   | 15.6489<br>[11.369, 20.1298]                   | 14.8604<br>[10.2687, 19.7842]          |
| Initial $I_{2A}$ | 2.4775<br>[0.93, 4.7359]         | 2.5871<br>[0.8709, 5.4459]                    | 2.6046<br>[1.0844, 4.7457]                     | 2.4337<br>[0.9037, 4.739]              |
| Initial $I_{1P}$ | 0.7469<br>[0.1234, 2.0681]       | 1.0026<br>[0.1587, 2.9233]                    | 0.6512<br>[0.1119, 1.7435]                     | 0.7594<br>[0.1288, 2.1112]             |
| Initial $I_{2P}$ | 2.9717<br>[1.3856, 5.1267]       | 3.5131<br>[1.409, 6.6521]                     | 2.8499<br>[1.4196, 4.7717]                     | 2.9786<br>[1.3647, 5.1574]             |
| $\mu_1$          | 0.8836<br>[0.4464, 0.9955]       | 0.8809<br>[0.5336, 0.9949]                    | 0.864<br>[0.3271, 0.9951]                      | 0.8809<br>[0.4259, 0.9957]             |
| $\mu_2$          | 0.0545<br>[0.0021, 0.2734]       | 0.0787<br>[0.0031, 0.3343]                    | 0.0592<br>[0.002, 0.309]                       | 0.0556<br>[0.0022, 0.2809]             |

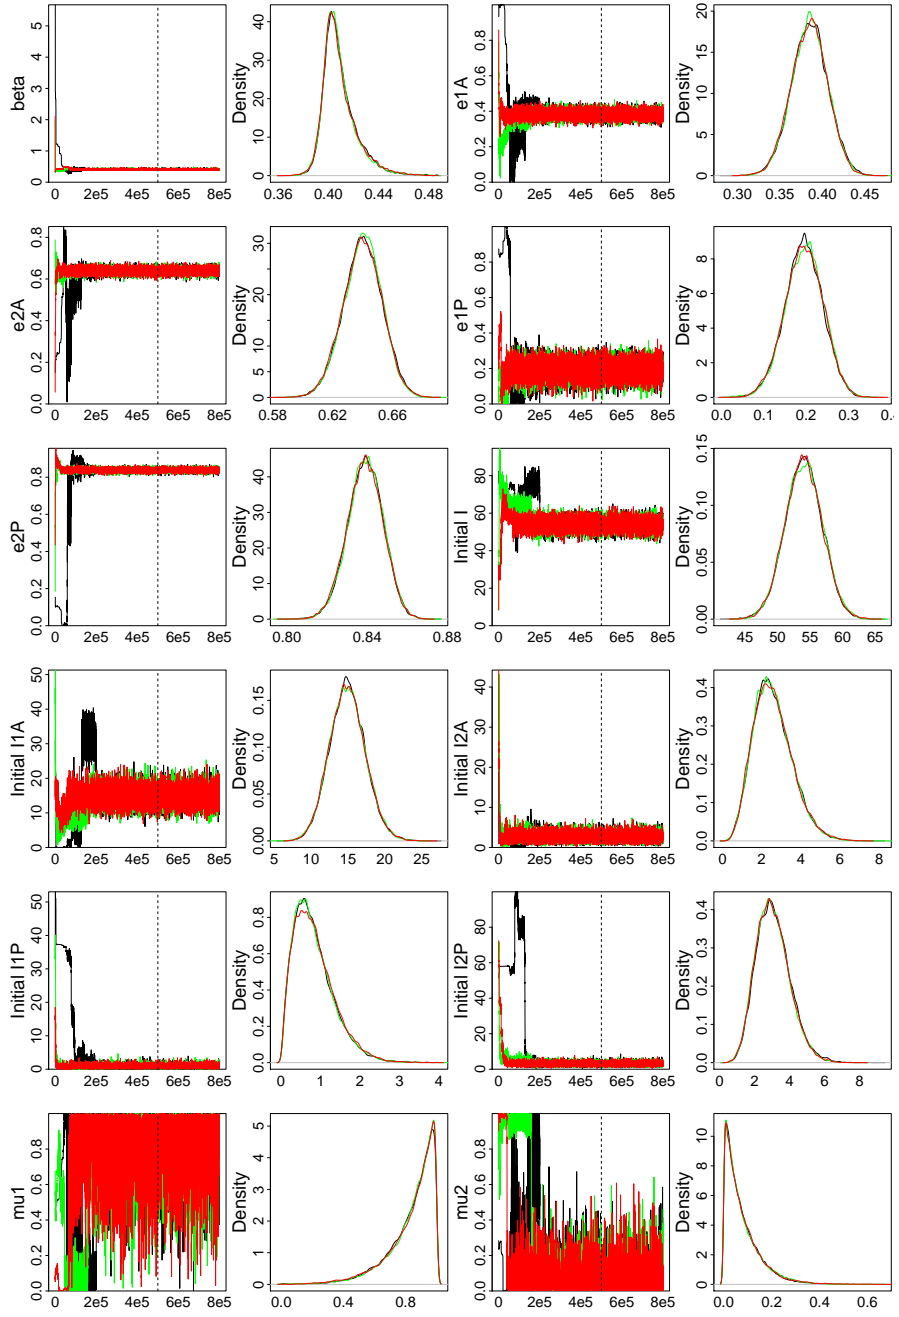

Figure S2.1: MCMC trace and posterior distributions for Core Model fit.

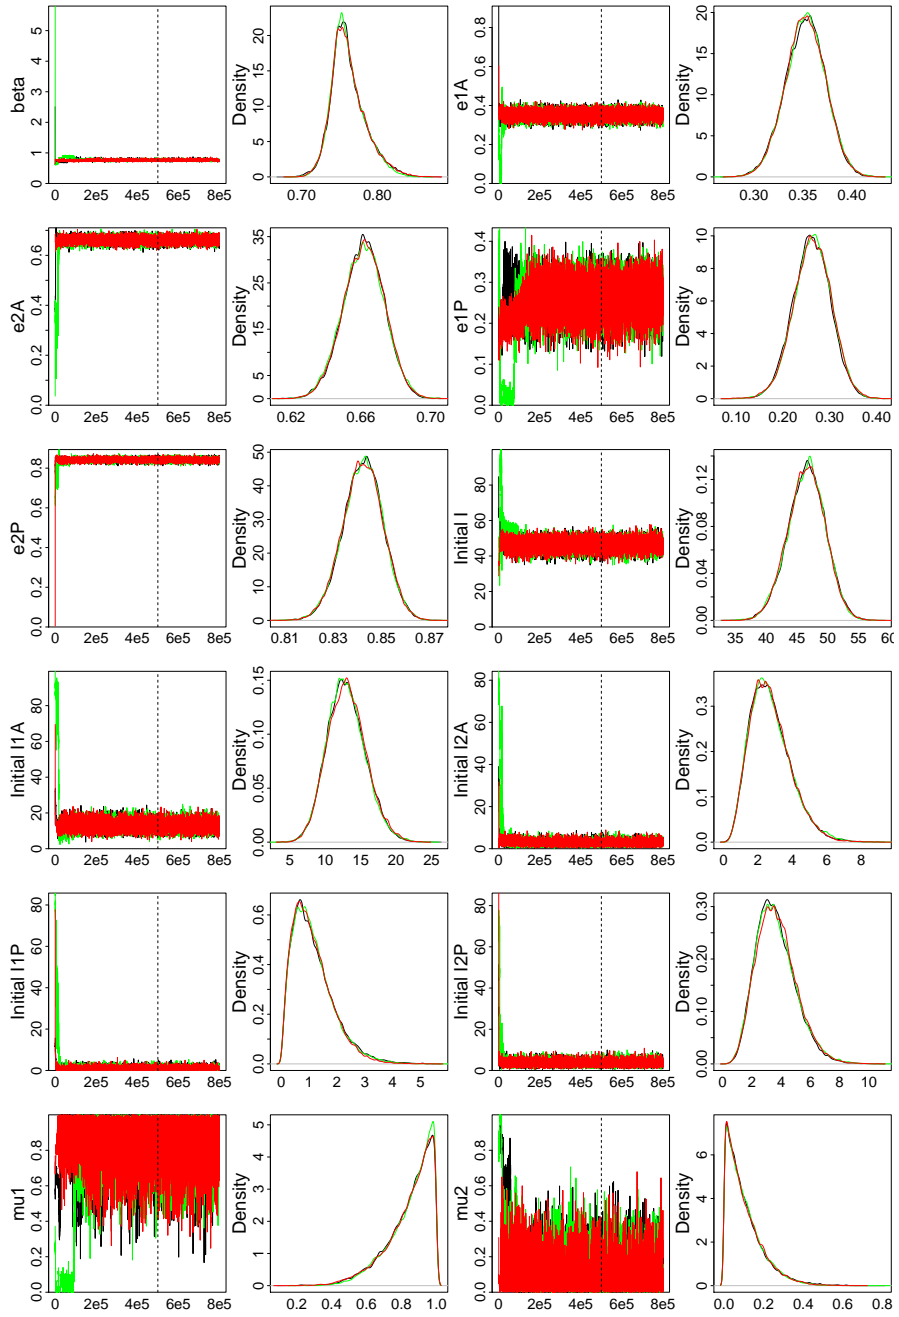

Figure S2.2: MCMC trace and posterior distributions for Sensitivity to  $\gamma$  ( $\gamma = 1/3$ ) fit.

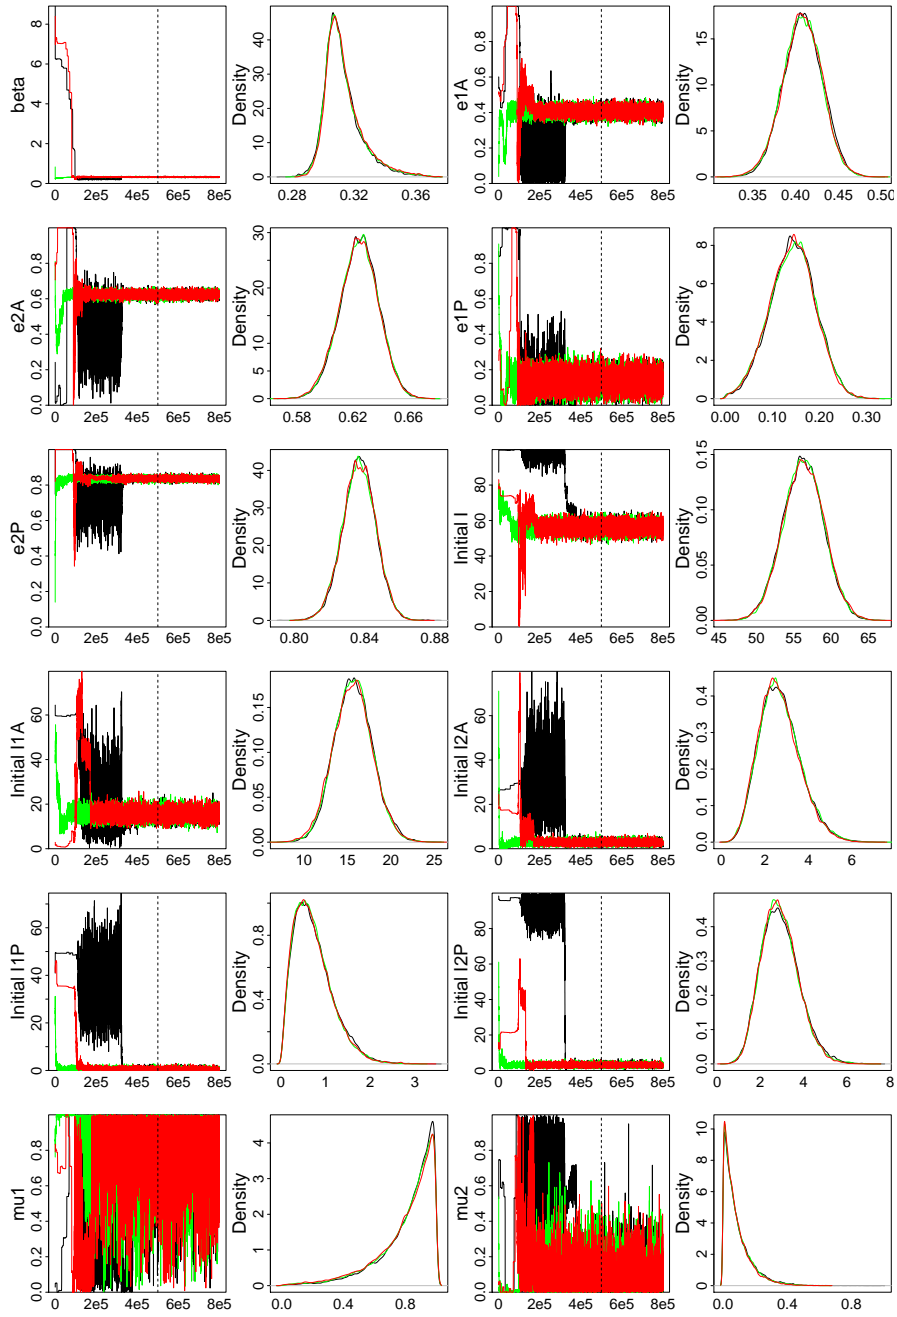

Figure S2.3: MCMC trace and posterior distributions for Sensitivity to  $\gamma$  ( $\gamma = 1/11$ ) fit.

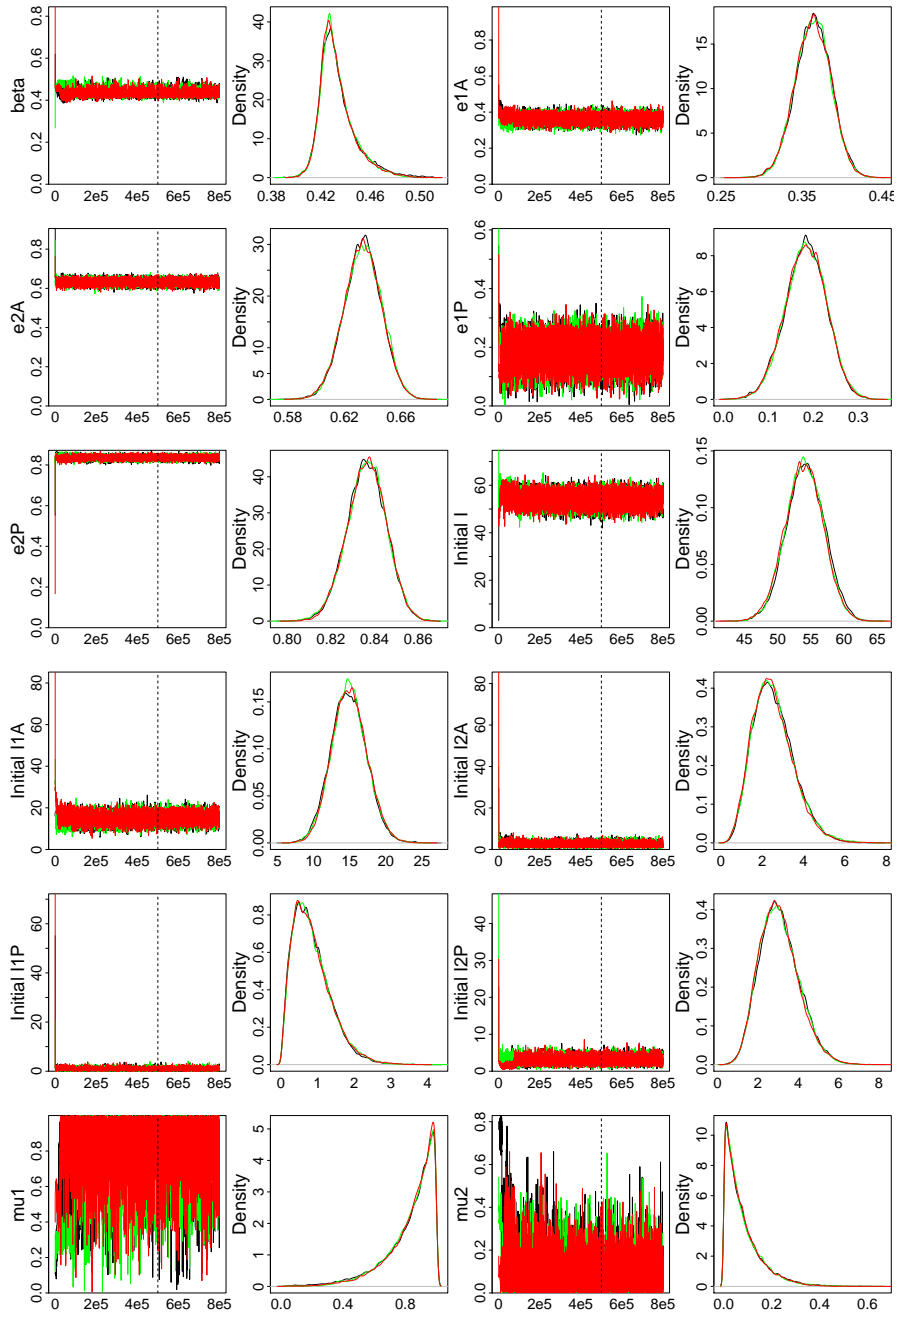

Figure S2.4: MCMC trace and posterior distributions for Double Removed fit.



### S3 Log Likelihood Profile

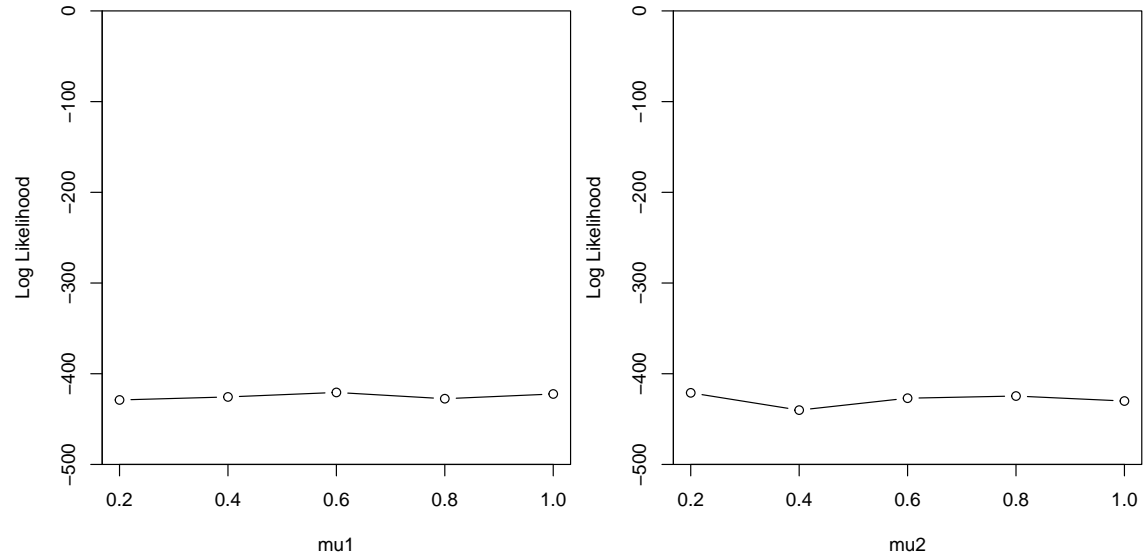

Figure S3.1: Log likelihood profiles for infectiveness ( $\mu_i$ ). To construct the log likelihood profile, we fix the value of  $\mu_i$  and find the optimum values of all other parameters (max likelihood) by fitting the model using MCMC as described in the main text. Doing this for all values of  $\mu_i$  gives the likelihood profile. A flat profile implies alternating the value of  $\mu_i$  does not improve the fit.
